# Supplementary figures and images for: The first spectrofluorimetric protocol for sensitive quantitative analysis of bromocriptine in its pure and pharmaceutical forms: evaluation of the greenness of the method
Source: Royal Society of Chemistry journal article supplement (doi:10.1039/d3ra06626f), 2023-01-01

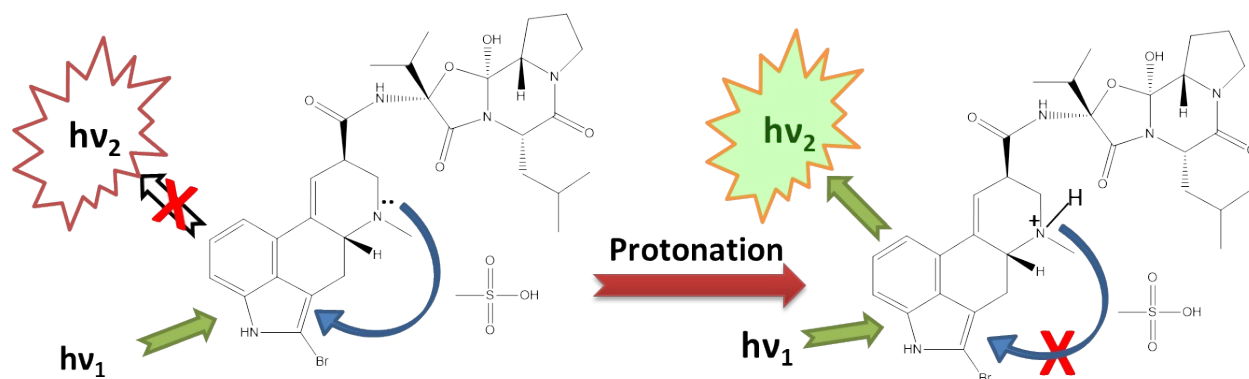

Suppl. (S1) : The mechanism of photo induced electron transfer (PET) and its blocking by protonation

Supplement: d3ra06626f1.pdf [file d3ra06626f1.pdf]
